# Supplementary material
Source: PubMed Central journal article supplement (PMC3331714)
Supplement: NIHMS362314-supplement-1_si_001.pdf [file NIHMS362314-supplement-1_si_001.pdf]

SUPPLEMENTAL DATA

| Construct                                                                       | Registry title         | Registry number |
|---------------------------------------------------------------------------------|------------------------|-----------------|
| $P_y = \text{Ubc}$ , Gal4 = 0, $P_x = \text{none}$ (Fig. 2)                     | Ubc-CFP                | BBa_J176093     |
| $P_y = \text{Ubc}$ , Gal4 = 0, $P_x = \text{Ubc}$ (Fig. 2)                      | Test miR-luc sensor 1  | BBa_J176142     |
| $P_y = \text{Ubc}$ , Gal4 = 0, $P_x = \text{HPK}$ (Fig. 2)                      | Test miR-luc sensor 2  | BBa_J176143     |
| $P_y = \text{Ubc}$ , Gal4 = 0, $P_x = \text{CMV}$ (Fig. 2)                      | Test miR-luc sensor 3  | BBa_J176144     |
| $P_y = \text{Ubc}$ , Gal4 = 5, $P_x = \text{none}$ (Fig. 2)                     | Ubc-5xGal4-CFP         | BBa_J176095     |
| $P_y = \text{Ubc}$ , Gal4 = 5, $P_x = \text{Ubc}$ (Fig. 2)                      | Test miR-luc sensor 4  | BBa_J176145     |
| $P_y = \text{Ubc}$ , Gal4 = 5, $P_x = \text{HPK}$ (Fig. 2)                      | Test miR-luc sensor 5  | BBa_J176146     |
| $P_y = \text{Ubc}$ , Gal4 = 5, $P_x = \text{CMV}$ (Fig. 2), Circuit 2 (Fig. 3B) | Test miR-luc sensor 6  | BBa_J176147     |
| $P_y = \text{Ubc}$ , Gal4 = 10, $P_x = \text{none}$ (Fig. 2)                    | Ubc-10xGal4-CFP        | BBa_J176098     |
| $P_y = \text{Ubc}$ , Gal4 = 10, $P_x = \text{Ubc}$ (Fig. 2)                     | Test miR-luc sensor 7  | BBa_J176148     |
| $P_y = \text{Ubc}$ , Gal4 = 10, $P_x = \text{HPK}$ (Fig. 2)                     | Test miR-luc sensor 8  | BBa_J176149     |
| $P_y = \text{Ubc}$ , Gal4 = 10, $P_x = \text{CMV}$ (Fig. 2)                     | Test miR-luc sensor 9  | BBa_J176150     |
| $P_y = \text{HPK}$ , Gal4 = 0, $P_x = \text{none}$ (Fig. 2)                     | HPK-CFP                | BBa_J176092     |
| $P_y = \text{HPK}$ , Gal4 = 0, $P_x = \text{Ubc}$ (Fig. 2)                      | Test miR-luc sensor 10 | BBa_J176151     |
| $P_y = \text{HPK}$ , Gal4 = 0, $P_x = \text{HPK}$ (Fig. 2)                      | Test miR-luc sensor 11 | BBa_J176152     |
| $P_y = \text{HPK}$ , Gal4 = 0, $P_x = \text{CMV}$ (Fig. 2)                      | Test miR-luc sensor 12 | BBa_J176153     |
| $P_y = \text{HPK}$ , Gal4 = 5, $P_x = \text{none}$ (Fig. 2)                     | HPK-5xGal4-CFP         | BBa_J176096     |
| $P_y = \text{HPK}$ , Gal4 = 5, $P_x = \text{Ubc}$ (Fig. 2)                      | Test miR-luc sensor 13 | BBa_J176154     |
| $P_y = \text{HPK}$ , Gal4 = 5, $P_x = \text{HPK}$ (Fig. 2)                      | Test miR-luc sensor 14 | BBa_J176155     |

|                                                                                                                 |                        |             |
|-----------------------------------------------------------------------------------------------------------------|------------------------|-------------|
| $P_y = \text{HPK}$ , Gal4 = 5, $P_x = \text{CMV}$ (Fig. 2)                                                      | Test miR-luc sensor 15 | BBa_J176156 |
| $P_y = \text{HPK}$ , Gal4 = 10, $P_x = \text{none}$ (Fig. 2)                                                    | HPK-10xGal4-CFP        | BBa_J176091 |
| $P_y = \text{HPK}$ , Gal4 = 10, $P_x = \text{Ubc}$ (Fig. 2)                                                     | Test miR-luc sensor 16 | BBa_J176157 |
| $P_y = \text{HPK}$ , Gal4 = 10, $P_x = \text{HPK}$ (Fig. 2), Circuit 1 (Fig. 3B), luc control circuit (Fig. 4A) | Test miR-luc sensor 17 | BBa_J176158 |
| $P_y = \text{HPK}$ , Gal4 = 10, $P_x = \text{CMV}$ (Fig. 2)                                                     | Test miR-luc sensor 18 | BBa_J176159 |
| $P_y = \text{CMV}$ , Gal4 = 0, $P_x = \text{none}$ (Fig. 2)                                                     | CMV-CFP                | BBa_J176094 |
| $P_y = \text{CMV}$ , Gal4 = 0, $P_x = \text{Ubc}$ (Fig. 2)                                                      | Test miR-luc sensor 19 | BBa_J176160 |
| $P_y = \text{CMV}$ , Gal4 = 0, $P_x = \text{HPK}$ (Fig. 2)                                                      | Test miR-luc sensor 20 | BBa_J176161 |
| $P_y = \text{CMV}$ , Gal4 = 0, $P_x = \text{CMV}$ (Fig. 2)                                                      | Test miR-luc sensor 21 | BBa_J176162 |
| $P_y = \text{CMV}$ , Gal4 = 5, $P_x = \text{none}$ (Fig. 2)                                                     | CMV-5xGal4-CFP         | BBa_J176097 |
| $P_y = \text{CMV}$ , Gal4 = 5, $P_x = \text{Ubc}$ (Fig. 2)                                                      | Test miR-luc sensor 22 | BBa_J176163 |
| $P_y = \text{CMV}$ , Gal4 = 5, $P_x = \text{HPK}$ (Fig. 2)                                                      | Test miR-luc sensor 23 | BBa_J176164 |
| $P_y = \text{CMV}$ , Gal4 = 5, $P_x = \text{CMV}$ (Fig. 2)                                                      | Test miR-luc sensor 24 | BBa_J176165 |
| $P_y = \text{CMV}$ , Gal4 = 10, $P_x = \text{none}$ (Fig. 2)                                                    | CMV-10xGal4-CFP        | BBa_J176099 |
| $P_y = \text{CMV}$ , Gal4 = 10, $P_x = \text{Ubc}$ (Fig. 2)                                                     | Test miR-luc sensor 25 | BBa_J176166 |
| $P_y = \text{CMV}$ , Gal4 = 10, $P_x = \text{HPK}$ (Fig. 2)                                                     | Test miR-luc sensor 26 | BBa_J176167 |
| $P_y = \text{CMV}$ , Gal4 = 10, $P_x = \text{CMV}$ (Fig. 2)                                                     | Test miR-luc sensor 27 | BBa_J176168 |
| miR-34 sensor + BCL2 target sites (data not shown)                                                              | miR-34 BCL2 sensor     | BBa_J176139 |
| miR-34 sensor + CCND1 target sites (Fig. 4A)                                                                    | miR-34 CCND1 sensor    | BBa_J176140 |
| miR-34 sensor + CDK6 target sites (Fig. 4A)                                                                     | miR-34 CDK6 sensor     | BBa_J176141 |
| miR-34 sensor + luc target sites + CFP-PEST (Fig. 4B)                                                           | miR-luc sensor 2PEST   | BBa_J176169 |

|                                                        |                        |             |
|--------------------------------------------------------|------------------------|-------------|
| miR-34 sensor + CDK6 target sites + CFP-PEST (Fig. 4B) | miR-34 CDK6 sensor 2.0 | BBa_J176170 |
| MV8 (zeocin resistance vector)                         | pcDNA3.1+zeo           | BBa_J176124 |

**Table S1.** Constructs and vectors. See the MIT Registry of Standard Biological Parts (<http://partsregistry.org>) for annotated sequences.

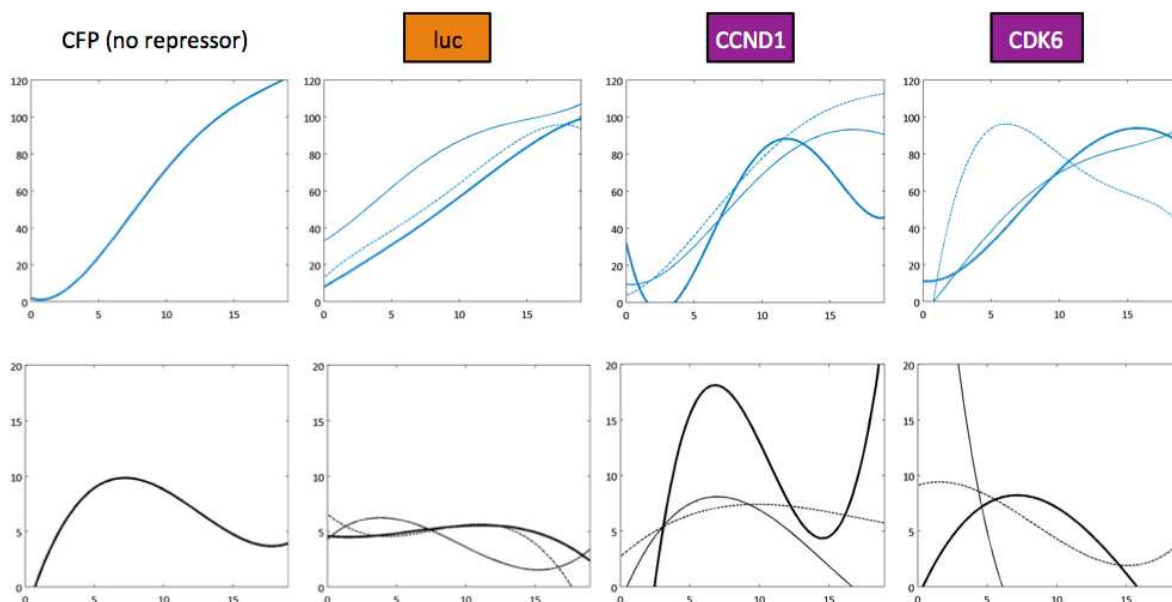

**Figure S1. Regression curves for data shown in Figure 4A.** Fourth degree polynomial best-fit curves for CFP output (top row, blue traces) were generated using MATLAB. The bottom row (black traces) are plots of the first derivative of the equations from the best fit curves. Line patterns correspond to the samples represented in Figure 4A. The first column of graphs, “CFP (no repressor),” were generated from averages of CFP expression from 5 individual cells, as a reference for the behavior of un-repressed CFP over time.

|         | Target sites                                                                                     |                                                                                                  |                                                                                                   |
|---------|--------------------------------------------------------------------------------------------------|--------------------------------------------------------------------------------------------------|---------------------------------------------------------------------------------------------------|
|         | BCL2                                                                                             | CCND1                                                                                            | CDK6                                                                                              |
| miR-34a | <br>-30.5 ± 0.3 | <br>-21.3 ± 0.5 | <br>-25.4 ± 0.7 |
| miR-34b | <br>> -10       | <br>> -10       | <br>> -15       |
| miR-34c | <br>-30.4 ± 0.5 | <br>-20.9 ± 0.4 | <br>-23.1 ± 2.3 |

**Figure S2. Free energies of miR-34/target site duplexes suggest significant differences in RNAi behavior.** miR/target duplexes were predicted using RNAhybrid software. The duplexes with the lowest binding free energies are shown. The table lists average binding free energies ( $\Delta G^\circ$ , kcal/mol) of all miR/target duplexes with  $\Delta G^\circ \leq 20$  kcal/mol, or the three most stable miR/target duplexes.

#### SUPPLEMENTAL MATERIALS AND METHODS

**RNA hybridization analysis.** miR-34/target duplex structures and corresponding binding free energies were predicted using the online software RNAhybrid (freely available at <http://bibiserv.techfak.uni-bielefeld.de/rnahybrid/welcome.html>).<sup>1</sup> This software was chosen for its speed, favorable reviews, and demonstrated predictive power in identifying physiological miR/target interactions.<sup>2</sup> Mature sequences of human miR-34a, miR-34b, and miR-34c were derived from miRBase (<http://www.mirbase.org/>), and were submitted to RNAhybrid for hybridization analysis against each target sequence used in the miR-34 sensor device. No user-defined structural or energetic constraints were used to limit the search space of potential interactions. Only miR-34/target duplexes with predicted binding free energies of  $\Delta G^\circ \leq 20$  kcal/mol<sup>3-5</sup> were used to calculate average binding free energies.

## SUPPLEMENTAL REFERENCES

- (1) Rehmsmeier, M.; Steffen, P.; Hochsmann, M.; Giegerich, R. Fast and effective prediction of microRNA/target duplexes. *RNA* **2004**, *10*, 1507–1517.
- (2) Krüger, J.; Rehmsmeier, M. RNAhybrid: microRNA target prediction easy, fast and flexible. *Nucleic Acids Research* **2006**, *34*, W451–4.
- (3) John, B.; Enright, A. J.; Aravin, A.; Tuschl, T.; Sander, C.; Marks, D. S. Human MicroRNA Targets. *PLoS Biol* **2004**, *2*, e363.
- (4) Samols, M. A.; Skalsky, R. L.; Maldonado, A. M.; Riva, A.; Lopez, M. C.; Baker, H. V.; Renne, R. Identification of cellular genes targeted by KSHV-encoded microRNAs. *PLoS Pathog.* **2007**, *3*, e65.
- (5) Ritchie, W.; Rajasekhar, M.; Flamant, S.; Rasko, J. E. J. Conserved expression patterns predict microRNA targets. *PLoS Comput. Biol.* **2009**, *5*, e1000513
